# Supplementary material for: Shapley values reveal the drivers of soil organic carbon stocks prediction
Source: Copernicus journal article supplement (doi:10.5194/egusphere-2022-1034), 2022-10-18
Supplement: Supplementary file 1 [file egusphere-2022-1034-supplement.pdf]

# Supplementary Materials

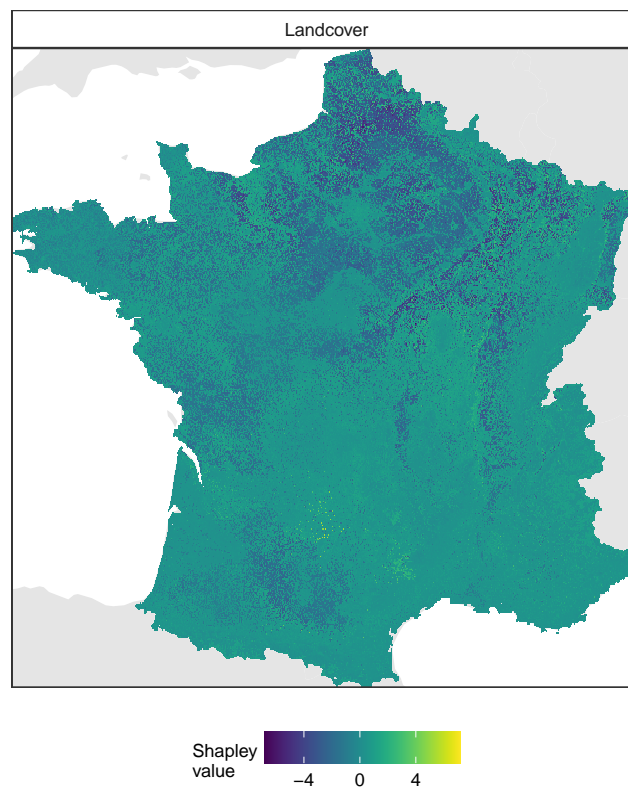

Figure 1: Spatial pattern of the Shapley values over mainland France for landcover. Dark colour indicate a negative contribution of the covariate to the SOC stocks prediction whereas a bright colour indicate a positive contribution.

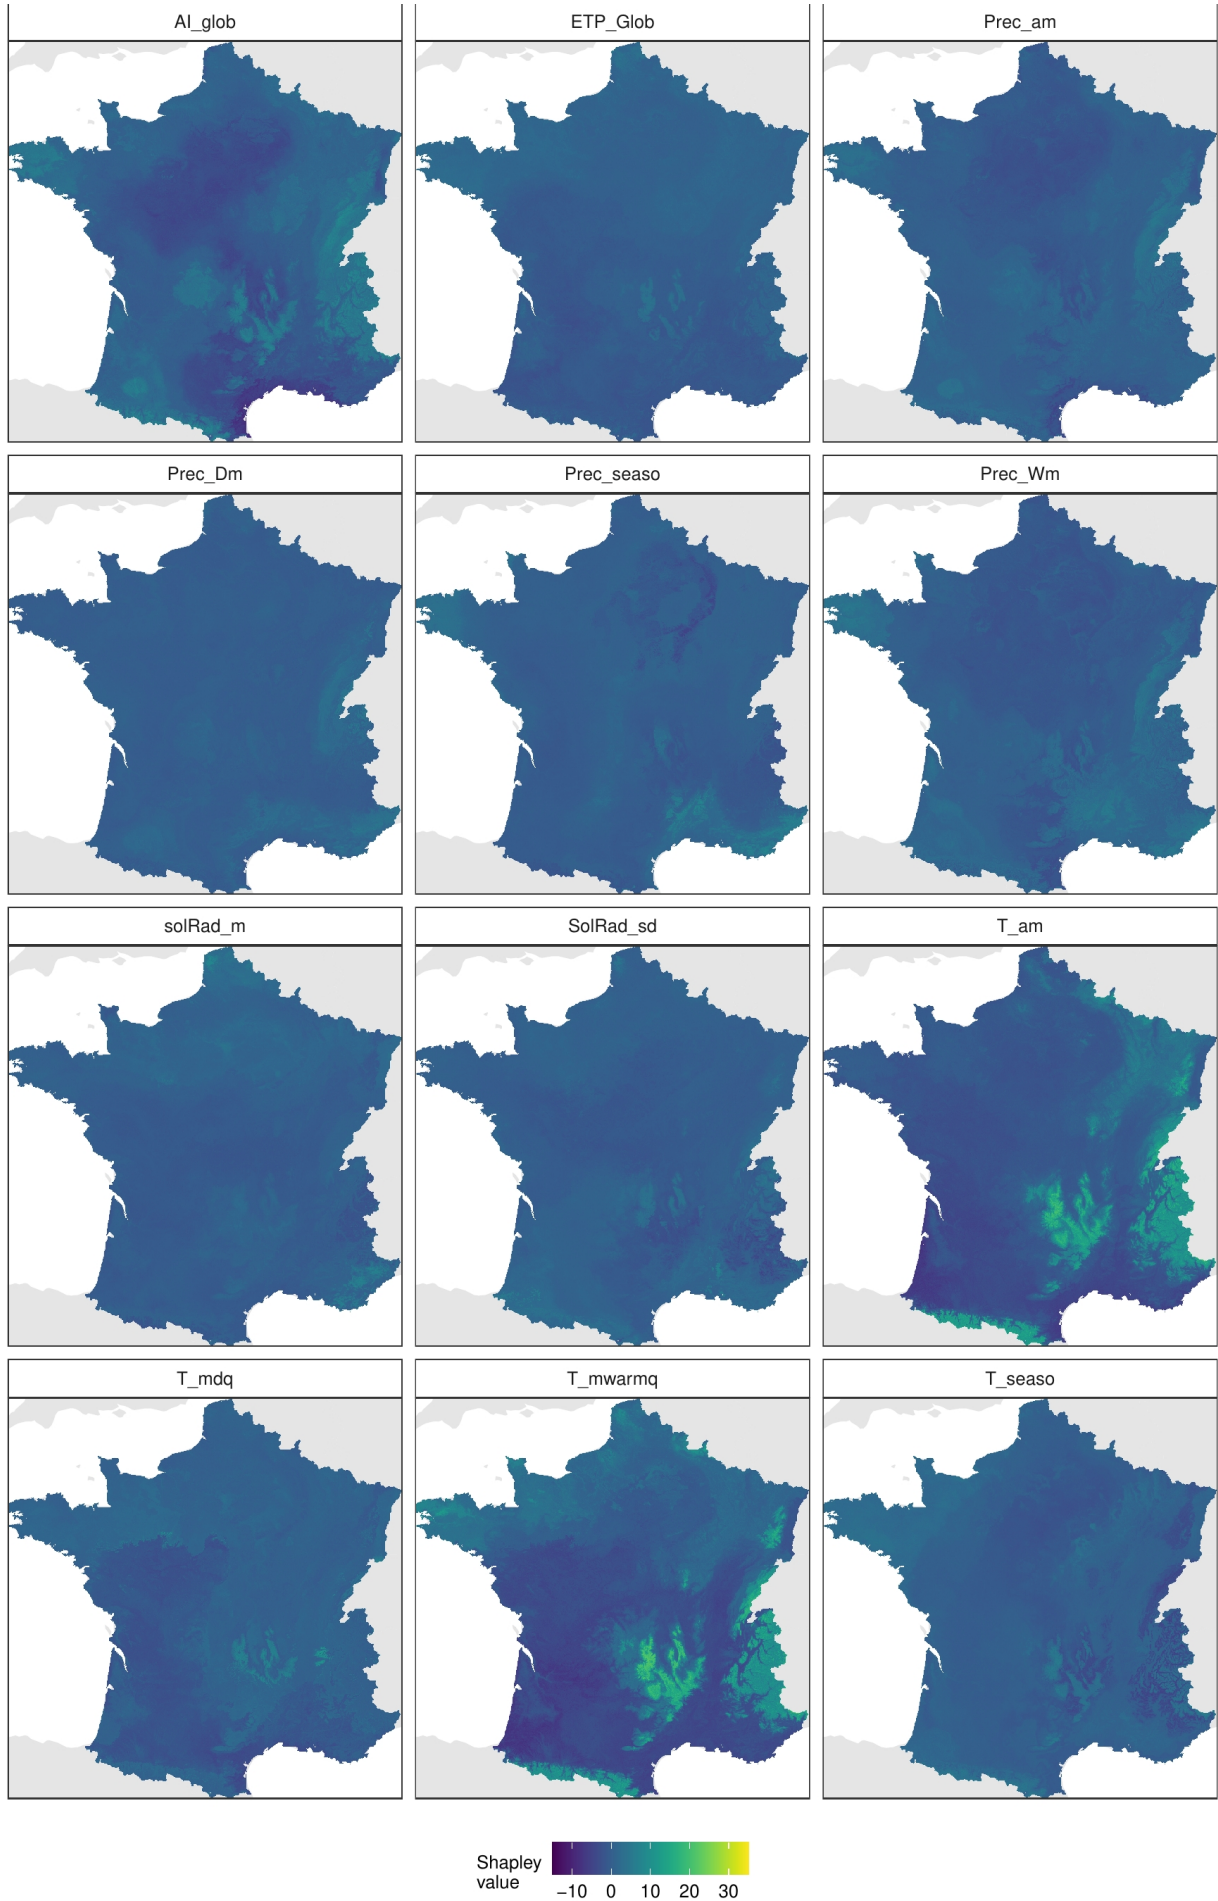

Figure 2: Spatial pattern of the Shapley values over mainland France for 12 covariates. Dark colour indicate a negative contribution of the covariate to the SOC stocks prediction whereas a bright colour indicate a positive contribution.

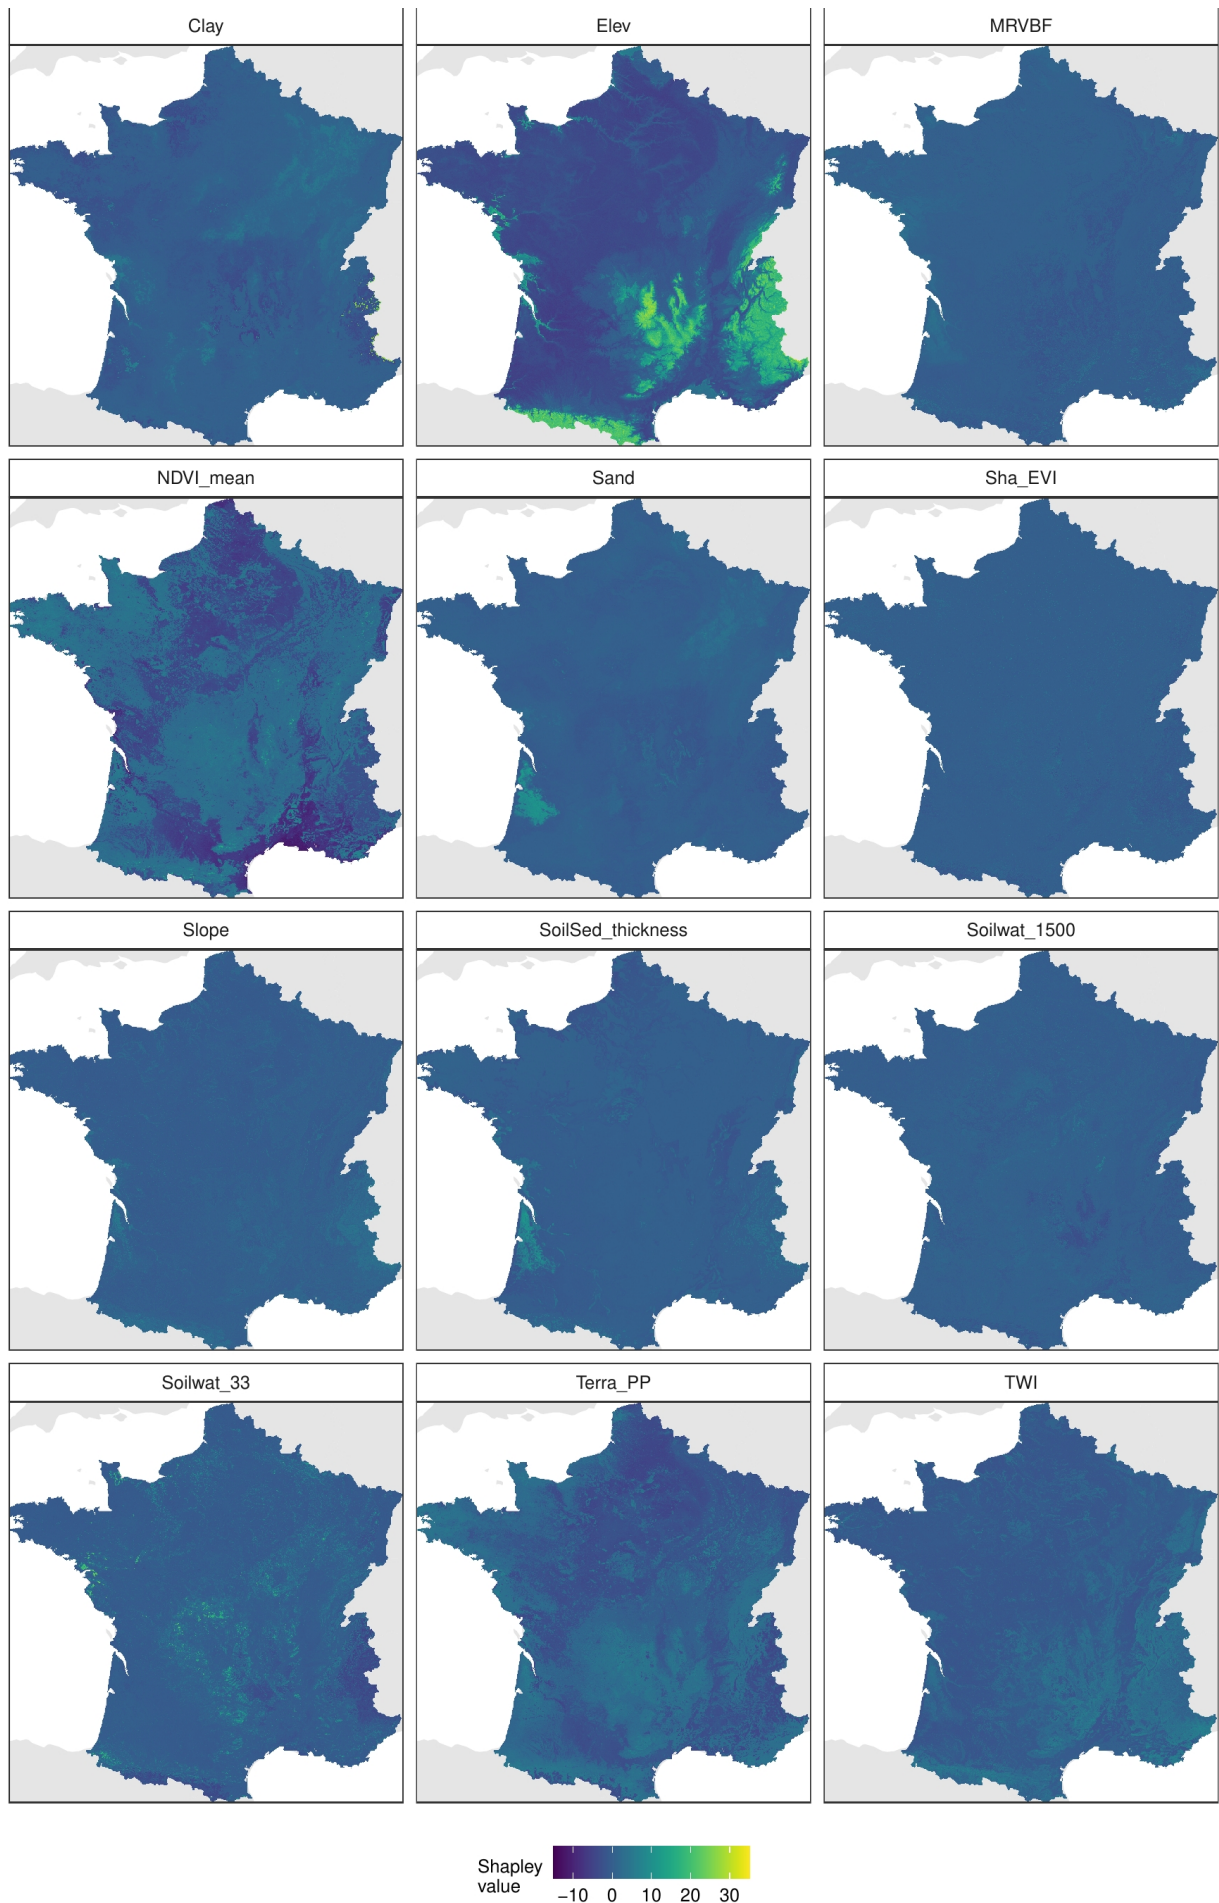

Figure 3: Spatial pattern of the Shapley values over mainland France for 12 covariates. Dark colour indicate a negative contribution of the covariate to the SOC stocks prediction whereas a bright colour indicate a positive contribution.
